# Supplementary material
Source: PubMed Central journal article supplement (PMC4577372)
Supplement: supp_pp.15.00106_PP2015-00106R1_Supplemental_Material.pdf [file supp_pp.15.00106_PP2015-00106R1_Supplemental_Material.pdf]

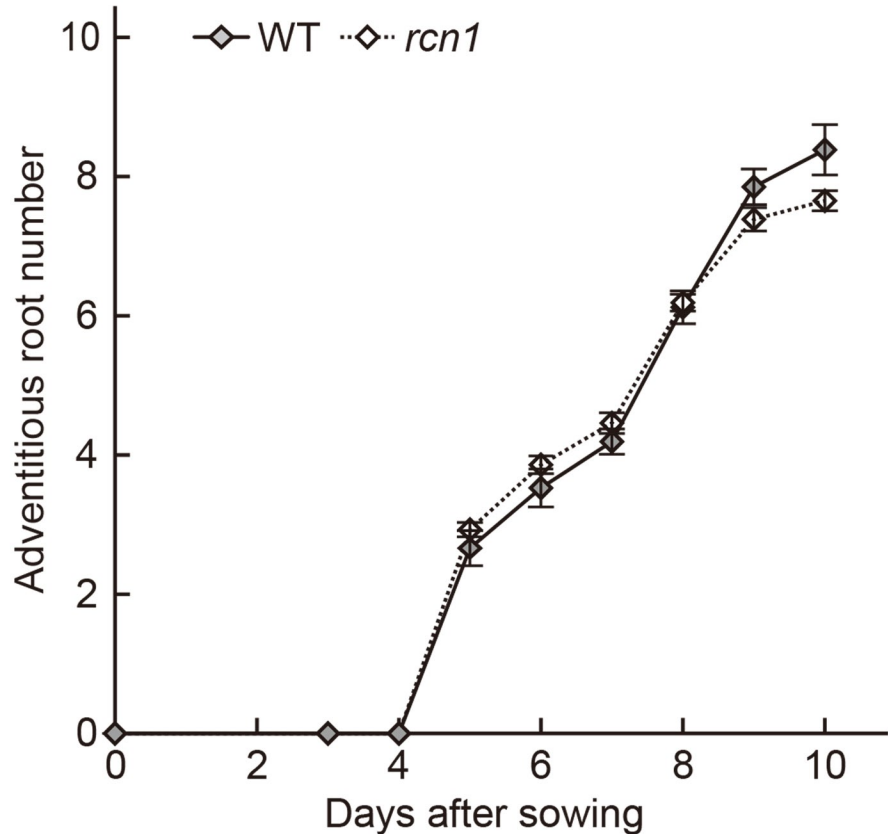

**Supplemental Figure S1.** Emergence of adventitious roots of the wild type and the *rcn1* mutant grown under aerated conditions. Emerged adventitious root numbers of the wild type and the *rcn1* mutant grown under aerated conditions were counted every day until day 10. Values are means ( $n = 15$ )  $\pm$  SE. No Significant differences were observed between the wild type and the *rcn1* mutant at  $P < 0.01$  (two sample *t* test).

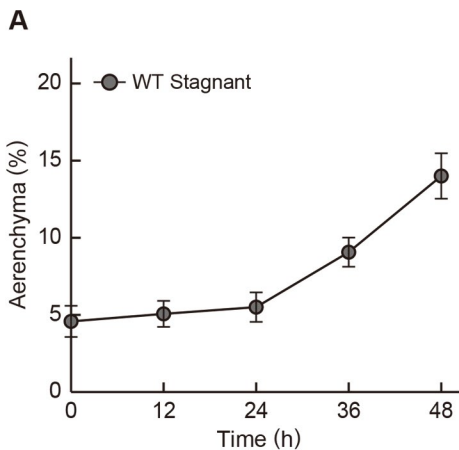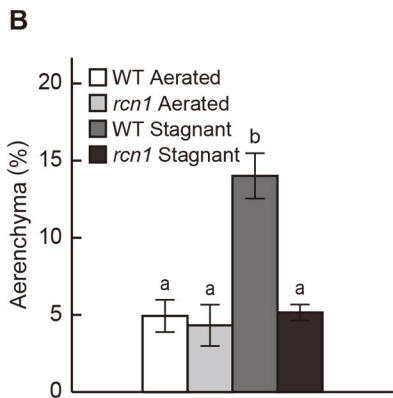

**Supplemental Figure S2.** Aerenchyma formation at 20 mm from the tips of adventitious roots in the wild type and the *rcn1* mutant. Twenty-d-old aerobically grown rice seedlings were transferred to aerated or stagnant conditions. Time-course of aerenchyma formation at 20 mm from the tips of adventitious roots in the wild type under stagnant conditions (A). The percentage of aerenchyma of root-cross-sectional area at 20 mm from the tips grown under aerated or stagnant conditions for 48 h (B). Values are means ( $n = 6$ )  $\pm$  SE. Different lower-case letters denote significant differences between the wild type and the *rcn1* mutant in each condition ( $P < 0.01$ , one-way ANOVA and then Tukey's test for multiple comparisons).

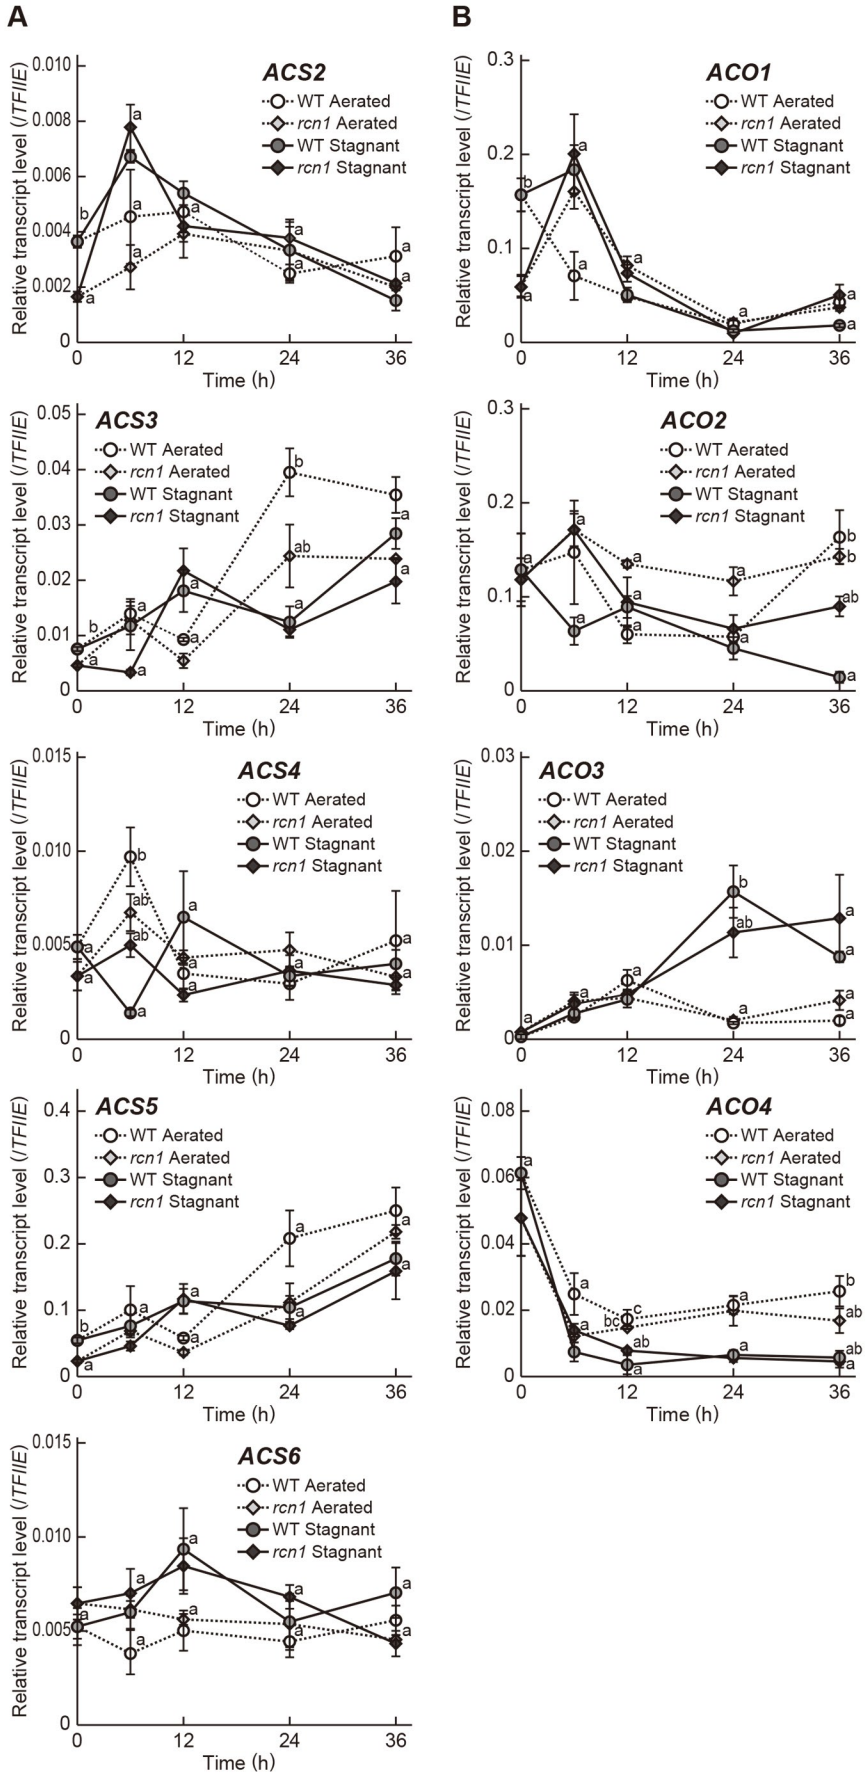

**Supplemental Figure S3.** Expression of genes encoding ethylene biosynthesis enzymes in adventitious roots of the wild type and the *rcn1* mutant grown under aerated or stagnant conditions. Time-course qRT-PCR analyses of the *ACS* genes (A) and the *ACO* genes (B) using RNAs extracted from adventitious roots at 10 mm ( $\pm 2$  mm) from the root tips grown under aerated or stagnant conditions. The transcription initiation factor *TFIIIE* gene was used as a control. Values are means ( $n = 3$ )  $\pm$  SE. Different lower-case letters denote significant differences between the wild type and the *rcn1* mutant in each condition ( $P < 0.01$ , one-way ANOVA and then Tukey's test for multiple comparisons).

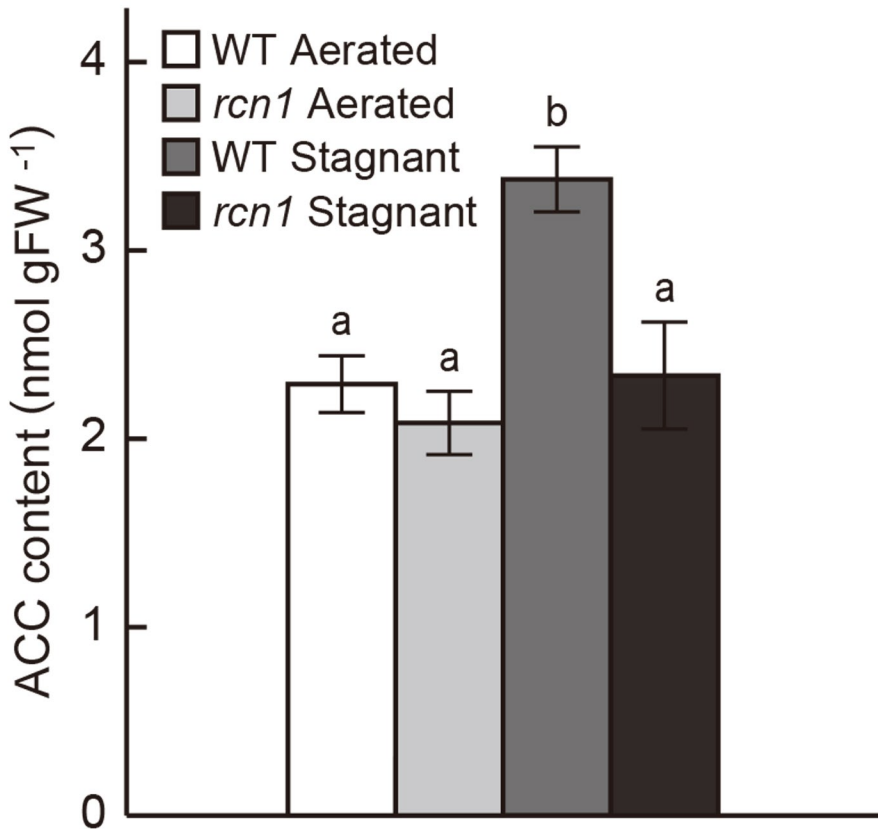

**Supplemental Figure S4.** ACC contents in adventitious roots of the wild type and the *rcn1* mutant. ACC content was measured at 10 to 30 mm from the root tips grown under aerated or stagnant conditions for 12 h. Values are means ( $n = 3$ )  $\pm$  SE. Different lower-case letters denote significant differences between the wild type and the *rcn1* mutant in each condition ( $P < 0.01$ , one-way ANOVA and then Tukey's test for multiple comparisons).

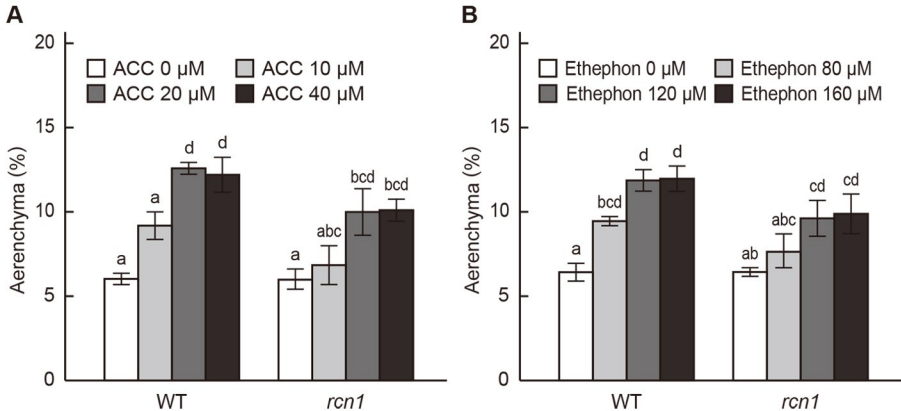

**Supplemental Figure S5.** Effects of an ethylene precursor and an ethylene-releasing compound on aerenchyma formation at 20 mm from the tips of adventitious roots of the wild type and the *rcn1* mutant. The percentage of aerenchyma of root-cross-sectional area at 20 mm from the tips of adventitious roots grown under aerated conditions for 48 h with 0, 10, 20 or 40  $\mu\text{M}$  ACC treatment (A), and grown under aerated conditions for 48 h with 0, 80, 120 or 160  $\mu\text{M}$  ethephon treatment (B). Values are means ( $n = 6$ )  $\pm$  SE. Different lower-case letters denote significant differences between the wild type and the *rcn1* mutant in each condition ( $P < 0.01$ , one-way ANOVA and then Tukey's test for multiple comparisons).

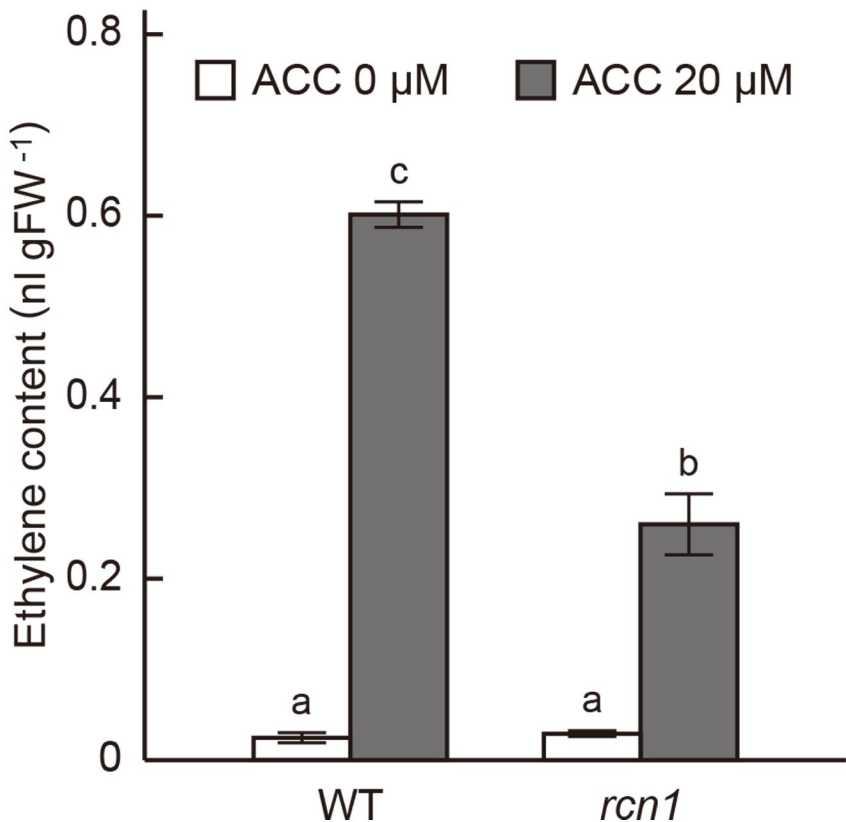

**Supplemental Figure S6.** Ethylene contents in roots of the wild type and the *rcn1* mutant grown under aerated conditions with or without 20 μM ACC treatment. Ethylene content was measured in roots at 24 h after initiation of growth under aerated conditions with or without 20 μM ACC treatment. Values are means ( $n = 3$ )  $\pm$  SE. Different lower-case letters denote significant differences between the wild type and the *rcn1* mutant in each condition ( $P < 0.01$ , one-way ANOVA and then Tukey's test for multiple comparisons).

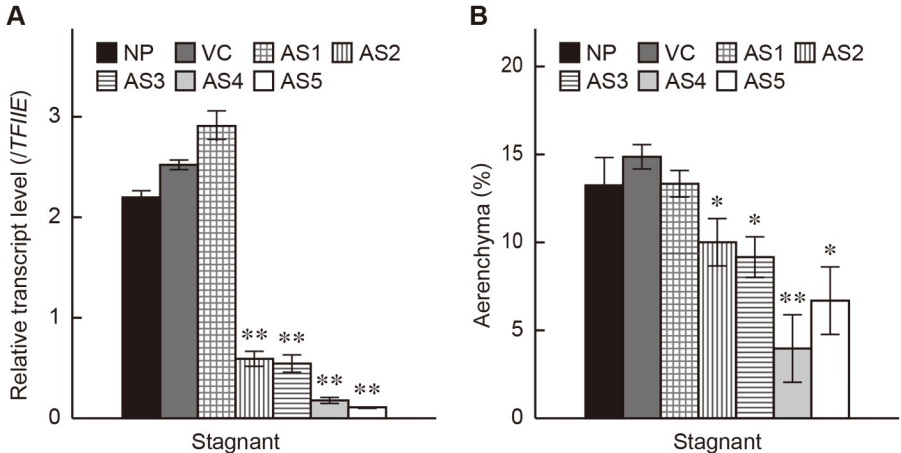

**Supplemental Figure S7.** Expression of the *CUTIL* gene and aerenchyma formation in adventitious roots of the *pACT1::CUTIL*-antisense  $T_0$  transgenic lines. The percentage of aerenchyma of root-cross-sectional area at 10 mm (A) and at 20 mm (B) from the tips of adventitious roots of the wild type (Nipponbare; NP), the *pACT1::CUTIL*-antisense  $T_0$  transgenic lines (AS1 to AS5) and the vector control (VC) grown under stagnant conditions for 48 h. All transgenic lines had a cv. Nipponbare background. Values are means ( $n = 3$ )  $\pm$  SE. Significant differences between each of the transgenic lines and the vector control at  $P < 0.01$  or at  $P < 0.05$  (two sample  $t$  test) are denoted by \*\* or \*, respectively.

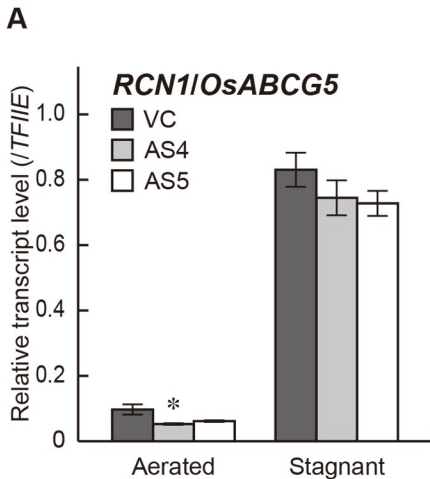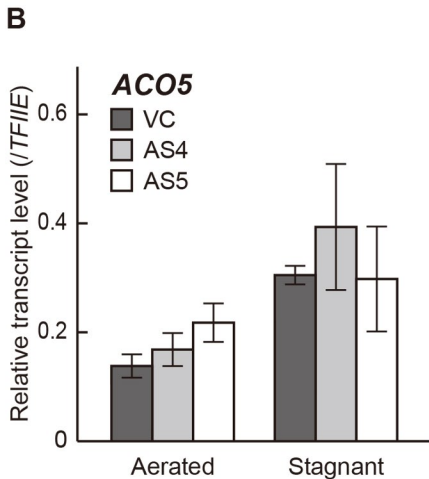

**Supplemental Figure S8.** Expression of *RCN1/OsABCG5* and *ACO5* in adventitious roots of the *pACT1::CUTIL*-antisense T<sub>1</sub> transgenic lines. qRT-PCR analyses of the *RCN1/OsABCG5* gene (A) and the *ACO5* gene (B) using RNAs extracted from adventitious roots at 10 mm ( $\pm 2$  mm) from the root tips of the *pACT1::CUTIL*-antisense T<sub>1</sub> transgenic lines (AS4 and AS5) and the vector control (VC) grown under aerated or stagnant conditions for 36 h. All transgenic lines had a cv. Nipponbare background. The transcription initiation factor *TFIIE* gene was used as a control. Values are means (n = 3)  $\pm$  SE. Significant differences between each of the transgenic lines and the vector control at  $P < 0.05$  (two sample *t* test) are denoted by \*.



**Supplemental Table S1.** List of primers used for qRT-PCR analysis

| <b>Gene Name</b>                                                                    | <b>ID (RAP-DB)</b> | <b>Forward primer sequence</b> | <b>Reverse primer sequence</b>  |
|-------------------------------------------------------------------------------------|--------------------|--------------------------------|---------------------------------|
| <b>ACC synthase (ACS)</b>                                                           |                    |                                |                                 |
| <i>ACS1</i>                                                                         | Os03g0727600       | 5'-ACAAAACCACACCATGTCCA-3'     | 5'-CGAAAGGAATCTGCTACTGCTGC-3'   |
| <i>ACS2</i>                                                                         | Os04g0578000       | 5'-CACCACCACCACCTCAGC-3'       | 5'-GACGTAGTAAGGCGCAGCAT-3'      |
| <i>ACS3</i>                                                                         | Os05g0196600       | 5'-GAGGCGAAGCTGAACATCTC-3'     | 5'-CATGTTGTTCTTGCTCCCATT-3'     |
| <i>ACS4</i>                                                                         | Os05g0319200       | 5'-AGCTGAGGCTGTGGGACA-3'       | 5'-GTGGCCAGGCTCATGTTC-3'        |
| <i>ACS5</i>                                                                         | Os01g0192900       | 5'-GCTTGGACACGCTGGATCTT-3'     | 5'-TTATTGCTGTTCTTGCTGCTG-3'     |
| <i>ACS6</i>                                                                         | Os06g0130400       | 5'-GGATGGTTCAGGTGTTGCTT-3'     | 5'-CCTGGCAAAGCAGTTATTCC-3'      |
| <b>ACC oxidase (ACO)</b>                                                            |                    |                                |                                 |
| <i>ACO1</i>                                                                         | Os09g0451000       | 5'-GATAGCGTGTGTACCACAGCGACC-3' | 5'-AGGTAGAAAACGCGAGCTGA-3'      |
| <i>ACO2</i>                                                                         | Os09g0451400       | 5'-AAGTCCATGGAAACCGAGAC-3'     | 5'-CCACAGTTCATGCACACACA-3'      |
| <i>ACO3</i>                                                                         | Os02g0771600       | 5'-GAGGTTCGTGTTTCGAGGACT-3'    | 5'-CGCAGCCGTAGCTAGTGAAG-3'      |
| <i>ACO4</i>                                                                         | Os11g0186900       | 5'-GCATGGCCAACATTGCTC-3'       | 5'-GTTCGCCAGGGCTGCGAACC-3'      |
| <i>ACO5</i>                                                                         | Os05g0149400       | 5'-CGAGTACCCGGAGTACGTGTT-3'    | 5'-ATTTTGGCGCCTTGACGGCC-3'      |
| <i>ACO7</i>                                                                         | Os01g0580500       | 5'-GGACTACTACCAGGGCACCA-3'     | 5'-GATTAGCGCACGCGATTTTA-3'      |
| <b>G-type ABC transporter</b>                                                       |                    |                                |                                 |
| <i>RCN1/OsABCG5</i>                                                                 | Os03g0281900       | 5'-AAGTGGGAGTGCCTCTGGAT-3'     | 5'-GGTGAGACGAGGTGACGAT-3'       |
| <b>Fatty acid elongase (<math>\beta</math>-ketoacyl-CoA synthase; KCS)</b>          |                    |                                |                                 |
| <i>CUTIL</i>                                                                        | Os03g0220100       | 5'-AAGTGCCTCCGCACAGTC-3'       | 5'-ACCATGGATTTCGATCACAGC-3'     |
| <b><i>CUTIL</i> 5'-UTR primers for the <i>CUTIL</i>- antisense transgenic lines</b> |                    |                                |                                 |
| <i>CUTIL5UTR</i>                                                                    | Os03g0220100       | 5'-CCATCACCAACACACCACTG-3'     | 5'-TCCTACGTACGACTTTAGTTTCTTC-3' |
| <b>Control</b>                                                                      |                    |                                |                                 |
| <i>TFIIE</i>                                                                        | Os10g0397200       | 5'-GTGCAGCCCAAGGCTAAG-3'       | 5'-CGTCGAATAAGCGTAGAGCA-3'      |
